# Supplementary material for: In Vivo Efficacy of Voriconazole in a Galleria mellonella Model of Invasive Infection Due to Azole-Susceptible or Resistant Aspergillus fumigatus Isolates
Source: MDPI journal article supplement (doi:10.3390/jof7121012), 2021-11-26
Supplement: s1 [file s1]

**Table S1.** Classification of the histopathological lesions observed in infected and treated *G.mellonella* larvae.

| Stages                            | Description                                                                                  |
|-----------------------------------|----------------------------------------------------------------------------------------------|
| Stage 1: Minimal lesions          | Low invasion, rare and small foci containing mostly conidia<br>Germinated conidia and hyphae |
| Stage 2: Mild to moderate lesions | 2-a Not extensive<br>2-b More extensive                                                      |
| Stage 3: Marked lesions           | Extensive lesions with invasion and presence of numerous<br>intralesional hyphae             |

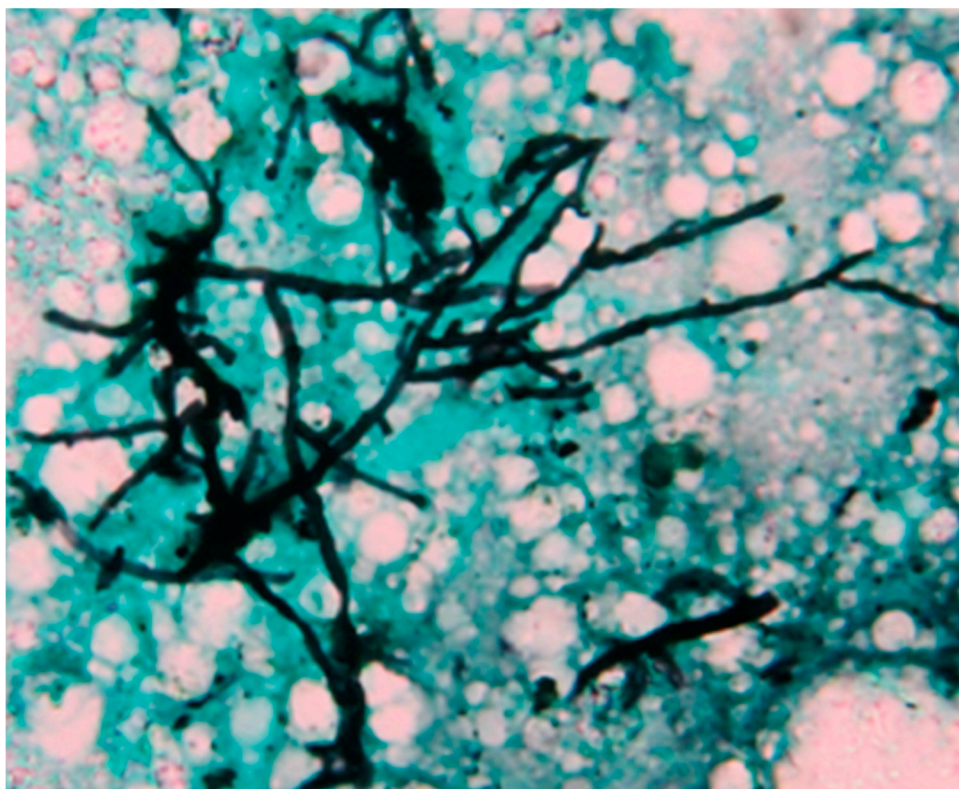

**Figure S1.** Direct examination of a larva infected with  $10^7$  cfu/ml of HEGP4017 *Aspergillus fumigatus* isolate. Gomori methenamine silver stain showing proliferating hyphae.
